# Supplementary material for: Quercetin Improves Barrier Properties in Porcine Small Intestine but Not in Peyer’s Patches
Source: MDPI journal article supplement (doi:10.3390/ijms25031530), 2024-01-26
Supplement: s1 [file s1]

**Table S1.** Normalized fold expression of different tight junction protein mRNA levels after 4h incubation with 400  $\mu$ M quercetin (n = 4, \*  $p < 0.05$ ).

| gene      | tissue | normalized fold expression<br>(mean $\pm$ SEM) | p-value |
|-----------|--------|------------------------------------------------|---------|
| claudin 1 | PP     | 0.81 $\pm$ 0.28                                | 0.53    |
|           | VE     | 1.40 $\pm$ 0.76                                | 0.61    |
| claudin 2 | PP     | 0.97 $\pm$ 0.26                                | 0.91    |
|           | VE     | 0.75 $\pm$ 0.18                                | 0.22    |
| claudin 4 | PP     | 1.24 $\pm$ 0.52                                | 0.66    |
|           | VE     | 1.7 $\pm$ 0.26                                 | 0.037 * |

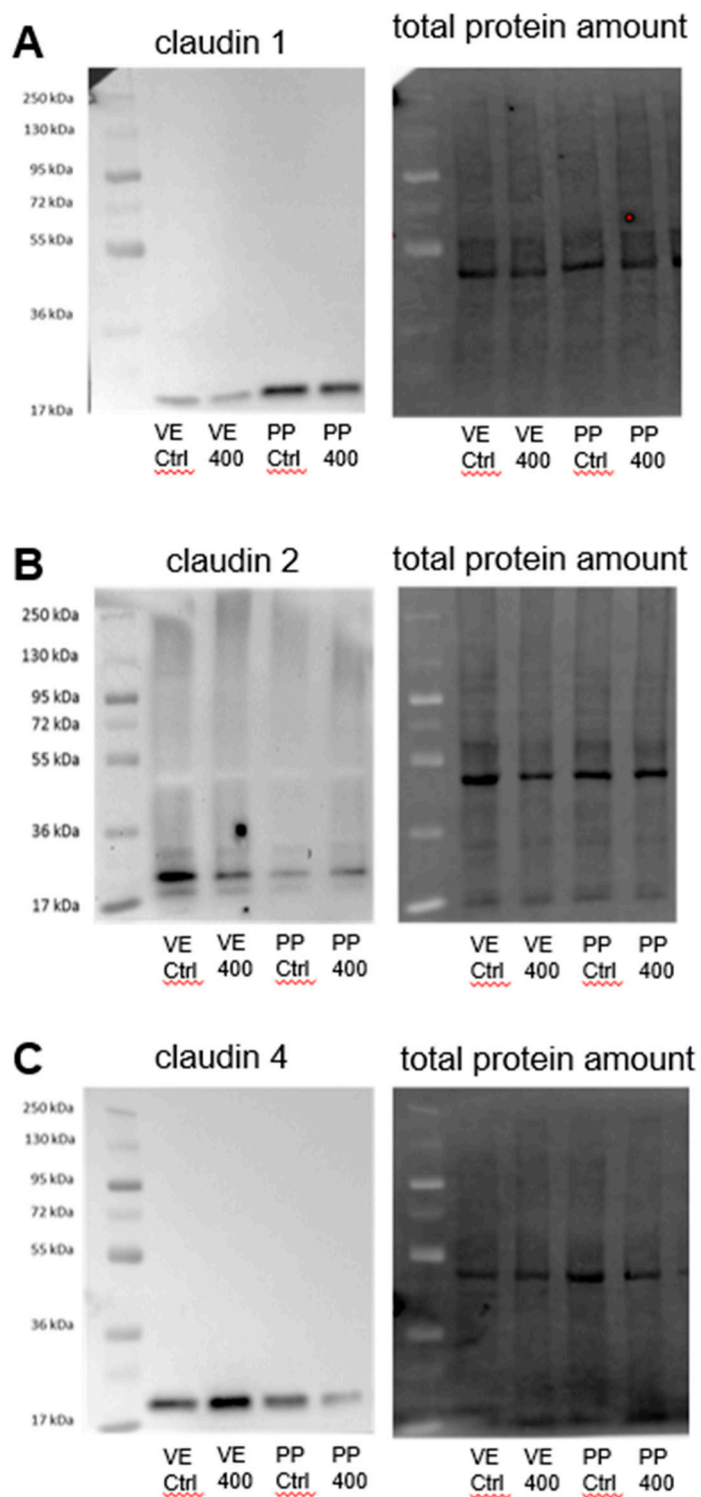

**Figure S1.** Quantitative protein analysis: PVDF membranes after detection of the total protein amount and the visualized protein bands. Proteins were extracted after 4h of incubation with quercetin Representative membranes were chosen.
